# Supplementary material for: Teacher's Attitudes as Knowledge Predictors
Source: Preprints.org preprint supplement (doi:10.20944/preprints201906.0214.v1), 2019-06-21
Supplement: Supplementary file 2 [file supplementary]

## Sheet: General
	Datos mejoramiento de la educación						Cursos que dicta											Afectiva
		Colegio donde labora			Años		Previos y Actuales					Universidades						General																Química													Biología
No.	Nombre	1	2	3	Servicio	Institución	1	2	3	4	Grado académico	Graduó	Tipo Univ.	Otra 1	Otra 2	Otra 3	Colegio donde se graduó	1,1	1,2	1,3	1,4	1,5	1,6	1,7	1,8	1,9	1,10	1,11	1,12	1,13	1,14	1,15	1,16	1,17	1,18	1,19	1,20	1,21	1,22	1,23	1,24	1,25	1,26	1,27	1,28	1,29	1,30	1,31	1,32
1	CMG	CBB			10	3	2	4			3	6	2	8			Liceo Pacífico Sur	6	6	2	7	2	7	7	6	7	7	7	7	7	7	7	7	5	7	2	2	4	6	3	7	3	5	7	7	3	6	7	7
2	PCB	CBB	LB		9	7	1	2	4		3	3	1	8			Liceo Unesco	6	6	7	7	7	6	6	6	6	5	6	6	7	7	7	7	5	2	7	3	3	3	4	5	4	4	4	3	4	7	7	7
3	DPV	CMVC			20	14	1				2	2	1	7			Liceo Ciudad Neilly	5	5	6	5	5	4	6	6	5	7	7	7	7	7	7	7	7	5	5	5	7	7	2	7	7	6	4	4	7	7	4	4
4	FMM	CMVC			32	32	1	2	3		2	2	1	3	18		CMVC	7	7	5	5	5	4	7	7	5	7	6	6	7	7	7	7	7	5	5	5	7	7	1	7	7	7	5	5	6	7	5	5
5	IBQ	CMVC			5	5	1	2	3	4	3	6	2	11			Nocturno Guaycara	6	5	3	7	7	7	1	1	7	1	1	3	7	7	3	7	7	5	5	5	7	7	1	7	7	7	5	5	7	7	5	5
6	JMP	CMVC			22	22	1	4			3	7	2	11	12	8	Colegio Guaycara	5	5	3	7	6	3	5	5	3	5	5	5	4	6	5	5	5	3	3	3	5	5	6	5	5	5	7	7	3	5	3	3
7	PHV	CMVC		CG	10	3	1	3	4		3	6	2	11			Liceo Ciudad Neilly	6	7	7	7	7	7	7	7	6	7	7	7	7	7	7	7	6	7	7	2	7	7	2	7	6	7	7	7	4	7	7	7
8	VMM	CMVC			10						2	6	2				Liceo Ciudad Neilly	1	1	7	7	7	7	1	1	7	3	6	6	7	7	7	7	5	7	7	7	7	7	7	7	4	7	7	7	2	7	7	7
9	AVR	CC			3	1	1	2	3	4	2	6	2				Bachillerato por madurez	4	4	4	7	4	3	3	3	3	4	4	6	6	6	6	7	6	6	5	5	7	7	2	6	6	6	7	6	5	7	7	7
10	AOC	CC			26	24	1	2	3		3	8	2	3	2		Colegio de Corredores	5		7	7	7	7	7	5	3	5	7	5	6	5	4	5	7	7	6	2	6	6	3	6	6	5	7	7	7	7	7	4
11	SMQ	CC			22	15	1	3	4		2	2	1	3	8		Colegio de Corredores	5	6	3	3	4	4	4	7	3	4	7	7	5	6	6	6	5	4	3	3	7	7	3	7	6	6	4	3	5	7	4	3
12	YRP	CC	LAB		11	3	1	2			3	7	2	8			Colegio Nocturno La Cuesta	6	5	5	5	5		6	5	3	6	3	6	7	5	6	6	3	5	6	5	5	6	5	7	3	3	2	2	3	7	7	7
13	JVO	CO			17	10	2	3			3	8	2	6			Colegio Nocturno San Vito	3	5	4	6	4	4	2	4	4	3	7	7	7	7	6	6	6	6	4	5	5	6	5	5	6	6	6	2	7	7	1	6
14	MLM	CO			25	25	3	4			3	3	1	2			Colegio de Osa	4	4	4	7	7	4	4	4	5	4	4	5	6	5	5	5	4	5	5	5	6	6	5	5	6	6	5	5	4	6	5	5
15	GCC	CO			8	6	1	2	3	4	2	8	2	6	17		Liceo Pacífico Sur	5	5	5	3	3	3	3	6	5	1	2		7	7	7	7	6	6	7	2	7	6	5	7	3	7	5	2	1	5	5	7
16	MVV	CS			13	3	1				2	5	2	7			Liceo Sabanilla	4	7	6	7	7	7	7	6	6	7	6	6	7	7	7	7	6	7	7	7	7	7	1	7	6	6	7	7	6	6	7	7
17	SGM	CS			11	5	3	4			3	6	2	8			Liceo Pacífico Sur	4	4	7	7	7	7	1	5	6	6	6	6	3	7	7	7	6	7	7	7	7	7	3	7	5	3	6	2	4
18	SAR	CS			16	12	1				2	2	1	6	17 y 5		Colegio Umberto Melloni	6	6	6	7	6	7	2	2	6	2	2	6	6	6	6	6	5	6	6	6	6	6	6	7	6	6	7	6	6	6	7	6
19	YZM	CS			18	12	1	2	3	4	2	8	2	7	6		Colegio Umberto Melloni	7	7	7	7	7	7	5	7	7	7	5	7	5	7	7	7	5	7	7	7	7	7	7	7	6	5	7	1	2	7	7	7
20	CJL	CS			11	2	1	4			2	6	2	17			Nocturno de San Vito	4	3	4	3	4	4	2	4	5	7	4	5	7	7	7	7	3	2	2	3	6	6	5	7	3		7	4	4	4	7	7
21	GBF	CS			10	6	1	2	3	4	3	17	2	2	3		Liceo República de Italia	6	6	2	7	7	5	6	6	4	5	6	6	7	6	6	7	5	6	6	6	6	5	5	5	6	5	7	6	5	7	7	7
22	IJJ	CSE	CS		8	6	1	2	3	4	1	6	2				IPEC. Agua Buena	4	3	4	4	5	4	4	4	4	7	6	5	5	5	5	6	6	2	3	4	6	5	3	6	6	6	5	3	2	6	6	6
23	DPVA	CG			17	13	1				3	7	2	2			Colegio Guaycara	6	6	7	7	1	7	6	6	7	7	7	6	7	7	7	7	6	7	7	7	7	7	7	7	6	6	7	6	4	6	7	7
24	EAQ	CG			18	17	1	3	4		3	7	2	8			Bachillerato por madurez	5	5	4	3	4	4	3	4	4	5	5	5	6	5	6	6	5	5	3	4	5	5	3	6	5	6	6	6	5	5	6	4
25	GJC	CH			10	3	2	4			3	6	2	17	3		Colegio Guaycara	6	6	5	7	6	6	5	5	6	7	7	7	2	7	4	6	5	6	7	7	7	7	7	7	4	6	7	7	4	7	7	7
26	LGC	CH			12	7	1	3	4		2	1	1	15			Colegio Daniel Octavio Crespo (Panamá)	5	5	6	7	6	7	5	5	3	5	6	5	5	5	5	5	5	7	5	7	5	5	7	5	5	5	7	3	4	4	5	5
27	LSV	CJV			1		1	2	3	4	2	0					Liceo Experimental Bilingüe Agua Buena	6	6	7	7	7	7	6	6	7	6	6	6	7	7	3	6	6	7	4	7		6	6	6	6	5	7	7	3	6	7	4
28	ACV	CP			20	16	3	4			3	5	2	7			Liceo Académico de Puriscal	4		3	3	2	3	5	5	3	6	7	7	7	7	7	7	5		2		7	7	2	7	6	5		2	4	6		1
29	GLM	CP			3	1	1				3	13	2				Liceo de Paraiso	5	5	5	5	4	5	6	4	5	5	6	6	7	7	6	7	5	5	5	4	4	6	4	7	6	7	5	3	3	5	5	5
30	JAP	CP			6	3	1	2			3	2	1				Liceo de Colorado	5	7	2	7	5	6	7	6	7	7	7	6	7	7	7	7	7	7	5	6	7	5	7	7	7	6	7	7	7	7	7	3
31	MRH	CPJ			5	5	1	3			2	6	2				INA	5	4	3		5		1	3	4	6	6	7	7	7	5	7	4	2	2	2	7	7	2	7	6		7	7	1	6	7	7
32	MBM	CPJ			10	2	1				3	6	2	8	11		Colegio Umberto Melloni	5	5	6	7	7	5	6	5	4	5	5	4	6	6	7	7	5	5	5	6	4	5	6	5	5	5	5	5	3	5	7	7
33	RAO	CPJ			7	3	1	2	4		2	6	2	8			Nocturno Ciudad Neilly	2	6	5	5	2	4	3	3	5	4	6	7	6	7	7	7	6	7	7	6	7	6	5	7	5		7	2	4	6	7	7
34	RSG	CPJ			26	15	1				3	3	1	8	1		Liceo San Cruz	5	7	2	7	7	6	7	6	3	6	4	4	6	6	7	7	5	5	3	3	4	3	4	6	5	6	3	6	5	6	7	7
35	AUE	CRI			19	16	1				4	2	1	3	17		Colegio Umberto Melloni	4	5	6	7	6	6	5	5	6	5	6	6	7	6	6	7	5	7	6	6	7	6	2	7	5	5	7	6	6	6	7	7
36	JCJ	CRI			9	5	1				1	6	2				Colegio de Corredores	2	2	6	4	6	4	1	2	1	1	7	4	1	4	2	4	3	3	2	4	4	4	4	5	4	4	3	3	3	4	4	7
37	KLV	CRI			5	5	1	2	3	4	2	6	2	1	3		Colegio Jorge Volio Jiménez	6	6	5	5	5	5	6	5	4	6	7	7	6	7	7	7	5	5	5	5	6	6	5	6	7	7	5	5	5	6	5	5
38	JPC	CUM			10	3	1	2	3	4	3	17	2	8	6		Liceo Santa Baibara-Heredia	7	7	7	7	7	7	6	6	7	7	6	6	6	6	7	7	6	7	3	2	7	7	6	7	5	5	7	4	3	5	7	6
39	LLR	CUM			14	12	1	2	3	4	3	3	1	8			Colegio Umberto Melloni	5	5	6	7	6	6	6	5	6	6	6	6	7	7	7	7	6	6	7	6	7	7	6	7	6	5	7	4	4	6	7	7
40	MCP	CUM			1	1	2	4			1	3	1				Colegio Jesús Ocaña Rojas	6	7	6	7	7	7	7	7	2	7	7	7		5	5	5	4	7	7	7	7	7	4	7	7	5	7	3	5	5	7	7
41	LCV	LAC			1	1	1				1	6	2				Liceo Comte	4	5	4	7	3	7	4	4	7	7	5	4	6	7	7	7	4	5	4	5	5	5	4	6	4	4	7	5	4	4	7	7
42	LPM	LBIC			11	7	1	2	3		2	6	2	3			Nocturno de San Vito	6	6	7	7	7	7	7	6	7	6	7	7	7	7	7	7	7	7	7	7	7	6	7	7	7	4	7	4	7	7	7	7
43	SRV	CBIC			3	2	1	4			2	6	2	17			Nocturno de San Vito	3	5	7	7	4	7	7	5	7	7	6	6	1	7	1	6	2	6	4	7	4	4	4	5	7	6	7	7		6	7	7
44	MTB	LBS			11	10	1	2			3	13	2	11	6		Colegio Nocturno La Cuesta	2	2	6	6	6	6	1	1	7	7	7	6	7	7	7	7	2	7	1	2	7	7	7	7	1	7	7	1	1	7	7	1
45	JCV	LN			12	4	2				2	3	1				Liceo Comte	5	7	5	7	6	7	7	7	6	7	7	7	7	7	7	7	6	7	6	6	7	6	3	7	5	5	6	7	6	7	7	6
46	LVS	LN			18	14	1	4			2	7	2	2	3		Liceo Ciudad Neilly	5	5	2	7	4	7	1	4	5	6	6	5	7	6	7	7	6	7	4	6	6	7		6	5	6	7	5	2	4	7	7
47	LPA	LN			25	10	1	2	3	4	3	8	2	6			Colegio Nocturno Palmar Norte	7	7		7	7	1	1	7	1	7	7	7	7	1	4	7	7	7	1	7	7	7	7	7	7	7	7	7	7	7	7	1
48	MPB	LN			15	9	1				3	8	2	6			Educación Abierta	3	5	3	7	6	6	4	3	2	5	5	5	6	6	6	6	3	2	2	2	5	6	3	6	3	4	5	5	5	6	7	5
49	MMS	LN			2	2	1	2			2	6	2				Liceo Ciudad Neilly	5	4	5	7	5	2		5	5	7	6	6	1	7	5	7	2	7	3	7	6	6	7	6	3	5	7	5	1	5	7	7
50	NRD	LN			23	21	1	3			2	3	1	2			Colegio La Cuesta	3	3	5	5	5	5	1	3	5	4	4	4	5	7	7	7	5	4	3	4	5	4	4	6	3	3	7	4	4	5	3	2
51	PPP	LN			8	3					3	6	2	8			Liceo Ciudad Neilly	4	4	5	4	3	3	4	5	3	6	4	6	7	6	6	7	5	5	3	4	6	7	2	7	5	6	2		5	6	4	3
52	VVB	LN			18	9	1	2			3	11	2	6			Colegio Nocturno de Ciudad Neilly	4	5	4	3	3	6	5	4	4	5	6	4	7	5	7	7	5	6	2	4	6	6	4	6	6	5	6	6	2	6	7	6
53	YGR	LN			22	20	1	3			3	2	1	3			Colegio Corredores	3	3	5	6	1	4	2	2	5	4	6	6	4	5	5	5	6	7	3	4	7	7	3	7	7	6	7	7	2	4	7	5
54	APG	LN			4	4	4				3	6	2	8			Nocturno La Cuesta	3	4	5	3	5	4	4	3	3	5	3	6	7	6	5	6	4	4	4	5	5	6	5	7	5	6	6	6	3	5	6	4
55	ALC	LCP			3	2	1				2	13	2				Colegio 27 de Abril (Guanacaste)	3	1	6	7	7	3	1	5	2	7	5	2	5	3	5	7	5	7	1	3	1	5	4	4	3	5	7	1	4	3	7	4
56	JMZ	LCP			1	1	1	2	3	4	2	2	1	8	11		Colegio de San Isidro	6	7	7	7	7	7	7	6	5	6	7	7	4	7	2	7	7	7	3	7	7	6	1	7	7	4	3	3	7	7	7	7
57	NMR	LB			7	7	1	2	3	4	2	6	2	2			Colegio de Buenos Aires	7	7	1	7	7	7	7	7	7	7	6	6	6	6	6	7	7	7	4	7	7	7	7	7	7	6	7	7	6	7	1	7
58	TMS	LB			7	4	2				1	6	2				Liceo de Borruca	5	5	4	7	7	6	4	5	6	4	6	6	7	7	5	7	4	4	3	4	5	5	6	4	5	1	5	6	5	6	7	7
59	MMS	LBA			6	2	1	2	3	4	3	13	2	2			Liceo Póas (Alajuela)	5	4	3	7	4	2	4	4	3	5	5	6	6	6	6	6	6	7	5	7	6	6	7	6	5	5	7	6	6	6	7	7
60	NAV	LBA			9	2	1	2	3	4	3	17	2	4			Nocturno de Buenos Aires	4	5	6	1	6	6	6	4	3	5	4	4	5	5	6	7	5	3	3	6	7	7	3	7	4	6	7	5	1	4	7	3
61	FLM	LC			12	9	1	3			2	3	1	2			Nocturno Palmar Norte	7	6	7	7	7	7	5	7	6	6	6	7	7	7	7	7	7	7	7	7	7	6	7	7	6	6	6	7	2	5	7	7
62	LJR	LC			5	5	1	2	3	4	3	8	2	1			Colegio de Osa	6	6	6	7	7	7	7	6	7	7	6	6	6	6	7	7	5	4	2	2	4	4	4	6	4	5	5	5	3	6	7	6
63	OCF	LC			23	13	1	2	3	4	2	6	2	2	7		Liceo Pacífico Sur	7	5	6	7	7	7	6	7	7	7	6	7	4	7	7	7	6	7	1	5	7	5	5	7	7	7	7	2	1	7	7	7
64	DCV	LS			7		1	2	3	4	3	3	1	5			Bachillerato por madurez	6	6	6	7	6	7	7	6	6	7	7	7	7	7	4	7	7	7	2	7	7	7	7	7	7	6	7	7	5	7	7	2
65	EQN	LS			17	7	1	2	3	4	4	1	1	3			Liceo Nuevo de San José	6	7	6	7	7	7	7	6	7	6	6	6		7	6	2	5	6	1	7	4	6	3	2	6	6	4	2	6	7	7	1
66	LBM	LS			10	6	2	3	4		4	6	2	8			Nuevas Oportunidades	6	6	4	3	6	3	6	5	6	5	5	5	4	4	4	4	4	6	3	4	4	4	4	4	4	4	6	6	3	4	6	6
67	AMG	LAB	ISV		6	6	1	3			2	6	2	17			Liceo Experimental Bilingüe Agua Buena	2	2	6	6	6		3	3	5	3	3	3	3	3	3	3	5	3	2	2	6	6	3	6	5	6	2	2	6	4	4	4
68	GMG	LAB			4	2	1				3	17	2	6			IPEC. Agua Buena	6	7	6	6	6	7	7	5	6	7	7	2	4	6	6	6	4	6	5	3	6	6	3	7	7	6	6	2	2	5	7	4
69	JCC	LAB			24	21	1	2	3	4	4	2	1	8	17		Colegio Corredores	7	7	7	7	7	7	1	2	1	1	7	7	7	7	7	7	7	7	7	7	7	7	7	7	7	7	7	7	6	7	7	7
70	LQM	LAB			7	1	1	2			3	7	2	8			Nocturno San Vito
71	RPM	LAB	LJV	CUM	8	8	1	2	3	4	3	6	2	8			Nocturno de San Vito	6	4	4	3	5	1	7	7	1	7	4		7	7	7	7	5	3	2	4		4	3	7	7	5	5	7	7	7	7	7
72	SMC	LAB			20	13	1	2	3	4	3	2	1	8			Colegio Umberto Melloni	6	6	7	7	7	7	6	6	7	6	4	5	4	4	2	4	5	7	6	6	4	5	4	5	6	4	6	6	3	5	6	6
73	LBC	LEC			14	8	1	2	3	4	2	3	1	18			Liceo San Carlos	6	7	6	7	6	5	7	5	6	6	7	5	1	5	6	7	5	7	3	7	6	5	6	5	6	6	7	6	5	6	7
74	YMG	LEC			1.7	1.7	1	2	4		2	3	1				Bachillerato por madurez	5	5	7	7	6	7	7	6	7	7	7	6	7	7	7	7	5	7	7	7	7	7	2	7	6		7	7	7	6	7	7
75	PGP	LFA			16	3	2	3			2	6	2	8	5		Nocturno Golfito
76	SFV	LFA			16	2	1				3	6	2	8			Nocturno Palmar Norte	3	3	5	5	3	4	4	4	4	4	6	6	5	7	7	7	6	5	3	5	4	4	4	4	4	4	1	3	6	6	7	7
77	SRA	LFA			5	3	1	2	3	4	2	6	2				Nocturno Guaycara	4	4	4	7	5	5	1	3	1	3	5	4	4	4	5	5	4	7	5	5	6	6	4	6	3	5	7	5	1	6	7	6
78	ESN	LFN			15	7	2	4			1	3	1				CMVC	7	7	7	7	7	7	7	7	7	7	7	7	7	7	7	7	7	7	2	1	7	7	2	7	7	7	7	7	2	4	2	2
79	GAJ	LFN			1	1	1				3	6	2	11			Liceo Ciudad Neilly	4	5	4	6	5	5	3	4	5		4	6	6	6	7		4	4	5	5	5	5	6	6	4		7	5	2	6	6	6
80	LGU	LFN			9	6	1	2			1	1	1	2	14		Colegio de Dota	5	5	4	7	5	4	5	5	5	5	5	3	7	7	6	6	4	5	4	5	5	5	4	5	4	4	6	6	5	7	7	6
81	MRD	LFN			6	5	1				2	6	2	3	2	11	Colegio Guaycara	5	3	4	6	4	2	5	6	6	7	6	6	7	7	7	7	7	7	7	7	7	7	7	7	7	7	7	7	7	2	5	5
82	ORB	LIU			9	5	2	3	4		3	13	2	8			Nocturno de Quepos. Aguirre	6	6	2	7	7	7	1	6	2	1	6	6	7	7	7	7	6	7	2	7	6	7	7	7	6	5	7	7	3	7	7	7
83	JRC	LLL			7	7	2	3	4		1	3	1	6			Liceo La Lucha	5	6	5	4		6	6	6	6	5	6	6	5	7	5	7	5	6	5	6	6	6		7	5	4	6	6	5	5	7	6
84	EPT	LLU			0.3	0.3	1				2	13	2					4	4	4	4	4	4	4	4	4	4	4	4	4	4	4	4	4	4	4	3	5	5	4	4	3	4	5	5	4	3	5	5
85	MMM	LMU			31	6	1	2			2	2	1	3	17		Colegio San Luís Gonzaga	5	6	5	5	5	5	6	6	5	7	7	5	7	7	7	7	6	5	5	5	7	7	5	7	7	7	5	5	7	7	5	5
86	CCM	LPS			2	1	2	3	4		2	6	2				Colegio Nocturno Buenos Aires	6	6	7	7	7	5	7	6	5	5	6	6	6	6	6	6	3	6	6	6	5	5	3	5	2	6	7	7	1	4	1	7
87	JCC	LPS			5	2	1	2	3	4	3	10	2	6			Experimental Bilingue Agua Buena	6	7	2	7	1	6	7	6	7	5	5	4	6	6	4	7	5	4	5	3	5	4	2	6	4	5	5	5	1	4	7	7
88	JCB	LPS			18	17	2	3	4		2	6	2	2	7		Liceo Pacífico Sur	5	5	3	4	4	4	4	5	3	4	5	6	6	6	6	6	6	5	5	5	6	6	5	6	5	6	5	3	4	7	5	5
89	MSV	LPS			16	16	2	3	4		3	2	1				Liceo Pacífico Sur	5	5	6	7	6	6	7	5	3	7	7	7	7	7	7	7	5	7	7	7	7	6	3	7	5	5	7	7	5	7	7	7
90	BPR	LP			10	5	1	2			2	6	2	17			Liceo de Comte	2	3	4	4	4	1	3	6	5	7	4	4	6	7	6	7	3	2	4	2	7	6	5	7	2	5	7	7	3	4	1	5
91	AAR	LPG			19	8	1	2			3	3	1	6	8		Colegio Umberto Melloni	6	6	2	6	6	6	6	6	7	6	6	6	6	6	6	6	5	6	6	6	6	6	6	6	6	6	7	6	4	6	7	7
92	AMM	LPG	LB		7	3	1	2	3	4	3	16	2	17			Colegio de Osa	7	7	1	7	7	7	7	7	7	7	7	7	7	7	7	7	7	7	7	7	7	7	7	7	7	7	7	7	7	7	7	7
93	JZB	LPG			8	6	1	2	3	4	3	8	2				Bachillerato por madurez	4	4	3	2	2	7	4	5	7	7	6	7	7	7	7	7	7	7	3	7	7	6	7	7	7	7	7	7	7	7	7	7
94	CVM	LAM			12	11					4	10	2	6	8		Liceo Ciudad Neilly	5	5	3	7	6	6	5	3	5	5	6	6	7	7	7	7	5	6	5	6	6	6	5	6						7	7	7
95	MPU	LBD			14	0.7	1	2			3	13	2				Colegio de Upala	4	4	4	4	4	3	3	3	3	4	6	5	4	5	4	4	5	4	4	4	5	4	4	5	4	3	4	4	3	5	5	3
96	VVF	LRC			19	3	1	2	3	4	2	3	1	2			Colegio de Buenos Aires	7	7	7	7	7	7	7	7	7	7	7	7	7	7	7	7	7	7	7	7	7	7	7	7	7	7	7	7	7	7	7	7
97	LAR	LRP			1	1					1	6	2	8			IPEC. Cindea Agua Buena	5	5	3	5	2	7	7	1	6	4	6	7	7	7	4	7	5	7	7	7	7	7	2	7	6	7	7	4	6	7	7	7
98	KVA	LRC			6	6	1	2			2	6	2	17			Liceo de Sabanillas	5	4	4	6	4	4	5	4	4	5	6	6	7	7	7	7	4	4	5	3	7	7	4	7	4	5	5	4	5	5	6	5
99	SOE	LRS			7	7	2	3	4		2	6	2	8			Liceo Yeri	4	5	4	4	3	4	5	4	4	5	5	5	4	4	4	5	4	4	1	2	6	6	2	6	4	4	7	4	1	5	7	6
100	JMR	LRSR			6	2	1	2			2	3	1	5			Técnico Profesional Corredores	5	7	6	7	7	7	5	5	6	7	7	7	7	6	7	7	5	7	4	6	6	7	7	6	6		7	5	7	7	7	7
101	MVV	LRVH			1	1	1				2	3	1	11			Nocturno de Buenos Aires	4	4	4	7	4	7	7	4	3	7	7	3		7	7	7	6	7	7	7	6	6	4	7	7	5	7	7	7	7	7	7
102	SRV	LSRN			5	5	1				1	0					Liceo San Rafael Norte	2	3	5	5	4	4	3	3		5	3	5	4	6	7	7	4	3	5	3	4	6	3	7	5	6	5	2	3	3	4	4
103	CGS	LSE	LBA	LLL	9	6	1	2	3	4	2	3	1				Educación Abierta	5	5	3	5	4	5	5	5	5	5	5	6	6	6	6	6	5	5	4	3	5	5	5	5	5	5	6	5	5	6	7	7
104	LRM	LSE			21	3	1	2	3	4	1	3	1	2			Liceo Ciudad Neilly	6	7	6	7	6	7	7	6	7	7	7	6	7	7	7	7	5	4	1	4	6	7	3	6	5	6	6	6	6	6	7	7
105	CTM	LSM			15	10	2	4			3	3	1	6	8		Técnico Profesional Sabalito	7	7	7	7	7	7	7	7	7	7	7	7	7	7	6	7	7	7	3	1	7	7	7	7	7	6	7	7	7	7	7	7
106	KRC	LSM			11	5	1				3	3	1	6			Liceo San Pedro	6	7	6	7	7	7	7	7	7	6	5	7	7	7	6	6	6	7	7	7	7	6	6	7	6	7	7	7	6	7	7	7
107	LGF	LSM			7	3	2	3	4		3	3	1				Telesecundaria Buena Vista	5	5	6	7	4	3	5	5	6	6	7	6	7	7	7	7	6	2	2	2	6	6	2	7	6	6	6	2	7	6	1	2
108	GNA	LT			5	5	1	2	3	4	2	17	2				Liceo de Terraba	5	5	3	2	3	2	6	5	2	7	6	6	7	7	6	7	6	7	6	5	7	6	6	7	6	6	6	6	7	7	7	7
109	YCJ	LTSCH			1	1	1	2			2	6	2				Liceo de Boruca	6	7	2	7	7	7	7	6	7	7	5	5	7	7	6	7	4	4	4	4	5	5	3	7	4	4	5	4	4	6	7	7
110	CDV	LYC			15	5	1	2	3	4	2	6	2				Liceo Pacífico Sur	4	4	5	6	6	6	3	3	5	3	5	6	6	6	7	7	6	7	6	6	6	7	2	6	6	5	7	2	7	7	7	6
111	HDF	LYO			14	4	3	4			3	11	2	2	3		A distaia. Bachillerato por Madurez	6	5	6	6	2	2	3	4	3	4	6	6	6	6	6	7	6	5	4	6	6	6	6		5	6	5	5	5	7	1	1
112	RSF	LYO			18	11	1	2	3	4	3	3	1	8	1		Liceo de Aserrí	5	5	6	7	6	6	6	5	6	6	6	6	6	5	6	6	5	6	6	7	6	6	6	6	5	5	7	4	4	6	7	7
113	Control Química 1										1	25	3
114	Control Química 2										1	25	3
115	Control Química 3										1	25	3
116	Control Química 4										1	25	3
117	Control Química 5										1	25	3
118	Control Química 6										1	25	3
119	Control Química 7										1	25	3
																																		5.23636	5.61468	4.42727	4.97248	5.97222	5.96364	4.46296	6.29358	5.3211	5.45631	6.03704	5	4.39815	5.88073	6.09259	5.66667
[truncated: 96 more columns]

## Sheet: Promedios
	109 diagnósticos	Química	Física	Biología
	Promedios	6.53986	4.71545	7.11756

## Sheet: CambioValores
	Reverse Scale Valuation Affective Dimension
	From	To
	1	7
	2	6
	3	5
	4	4
	5	3
	6	2
	7	1
